# Supplementary material for: Whole-body clonal mapping identifies giant dominant clones in zebrafish skin epidermis
Source: Oxford University Press journal article supplement (doi:10.1242/dev.199669), 2021-08-31
Supplement: dev199669supp.pdf [file dev199669supp.pdf]

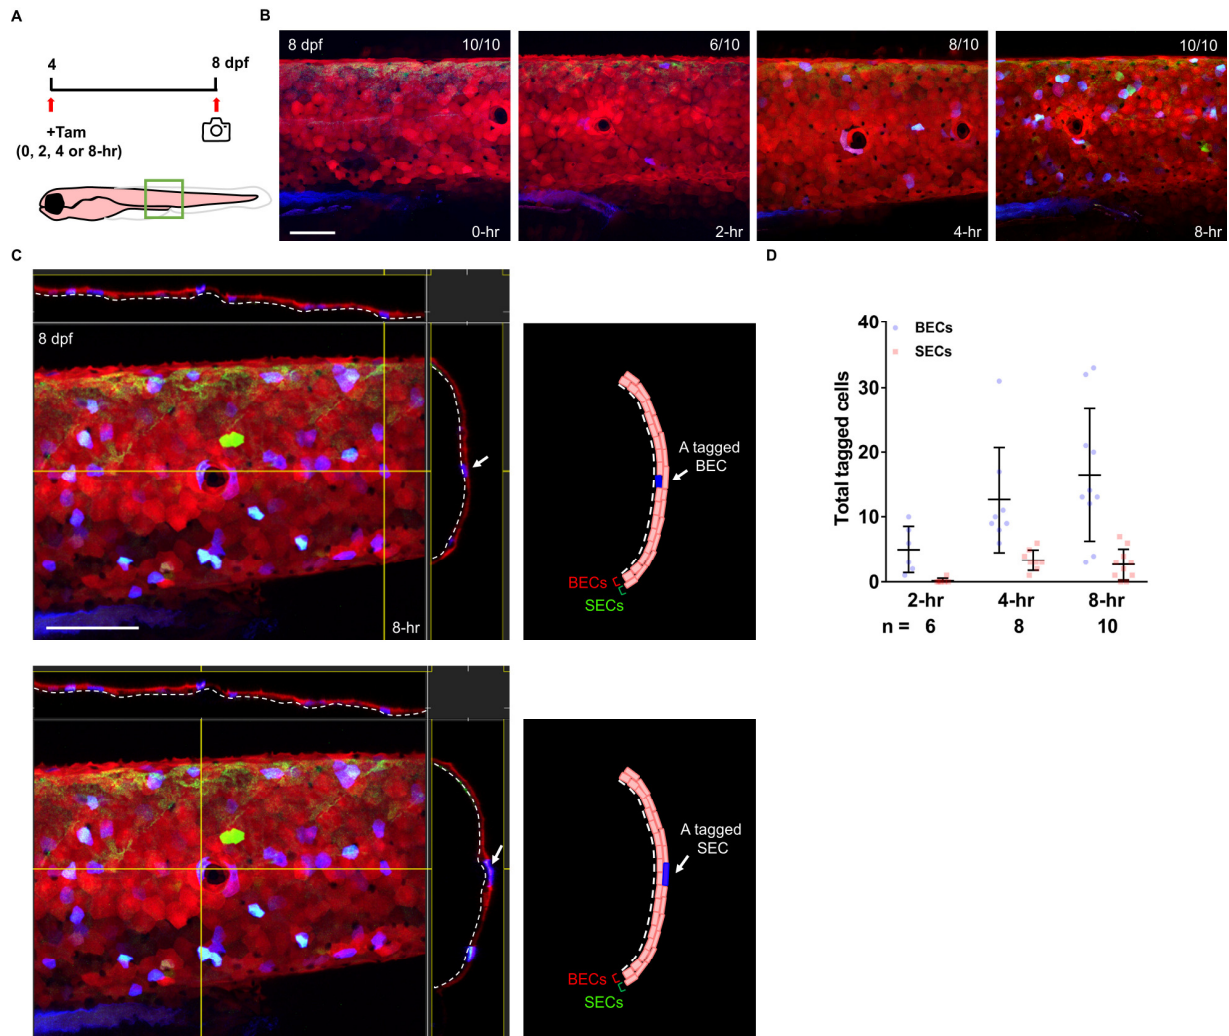

**Fig. S1. The length of Tam treatment determines the number of the tagged BECs.**

- (A) Timeline depicting the cell tagging and imaging scheme. Green box indicates imaged body regions. Tam, Tamoxifen. dpf, days post fertilization.
- (B) Confocal images of tagged cells in an 8 dpf *basebow* (n = 10 animals in each treatment group). Scale bar, 100  $\mu$ m.
- (C) Images of optical sections and illustrations depicting the position of a tagged BEC and SEC. White dashed lines mark basement membrane. SECs, Superficial epithelial cells. BECs, Basal epithelial cells. Scale bar, 100  $\mu$ m.
- (D) Quantification of total tagged BECs and SECs (465  $\mu$ m x 465  $\mu$ m; n = 6, 8, 10 animals, respectively; mean  $\pm$  SD).

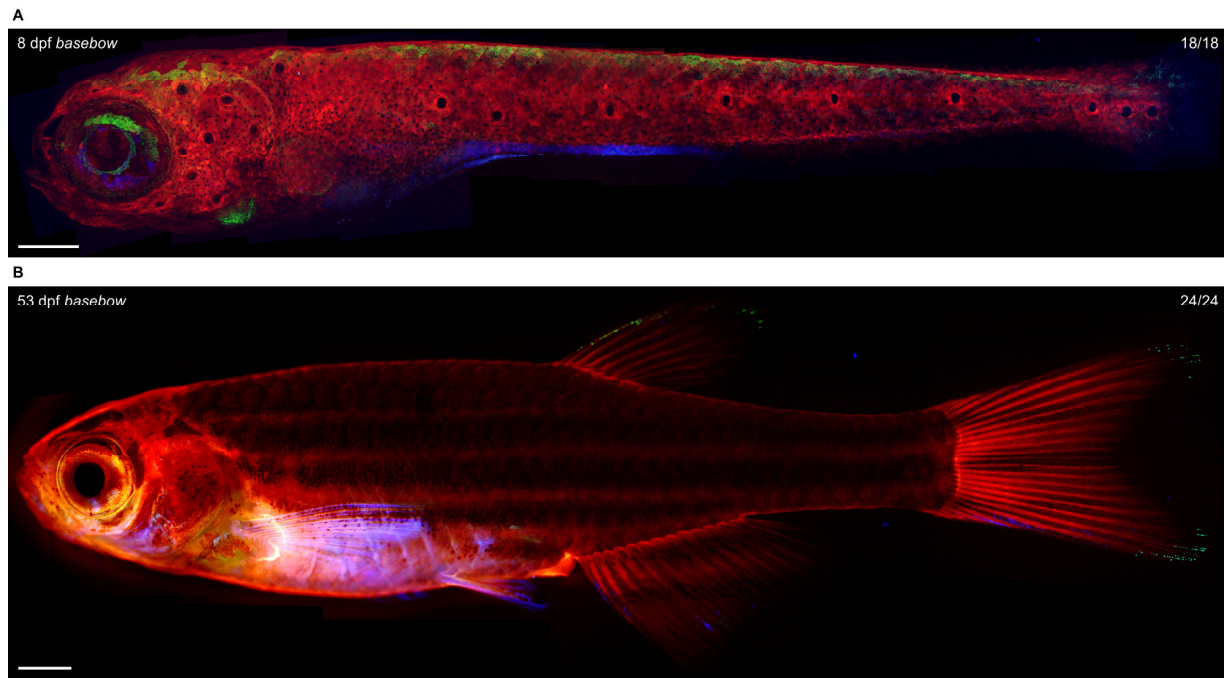

**Fig. S2. *Basebow* zebrafish has no leaky Cre activity during long-term monitoring.**

- (A) Whole-mount confocal image of an 8 dpf *basebow* (stitched; n = 18 animals). Scale bar, 200  $\mu$ m.
- (B) Whole-mount epifluorescence image of a 53 dpf *basebow* (stitched; n = 24 animals). Scale bar, 1 mm.

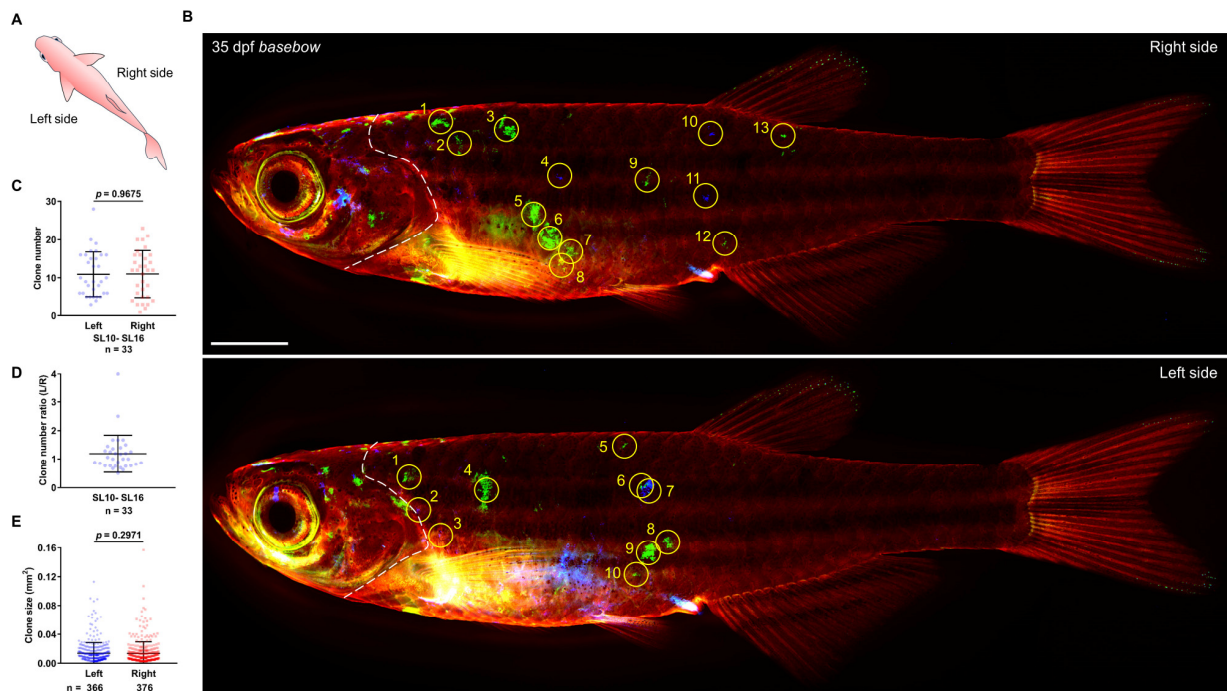

**Fig. S3. Clonal behaviors on both sides of the fish body surface are symmetrical.**

- (A) Illustration depicting the left and the right side of the fish body.
- (B) Representative whole-mount epifluorescence images of a 35 dpf *basebow* (stitched). Right side, top. Left side, bottom. Yellow circles mark examined BEC clones. Scale bar, 1 mm
- (C) Quantification of clone numbers ( $n = 33$  animals; mean  $\pm$  SD; two-tailed Student's *t*-test).
- (D) Quantification of clone number ratios. Clone numbers on both sides of the animal are symmetrical as the average ratio is close to one ( $n = 33$  animals; mean  $\pm$  SD).
- (E) Quantification of clone size ( $n = 33$  animals; mean  $\pm$  SD; two-tailed Mann-Whitney test).

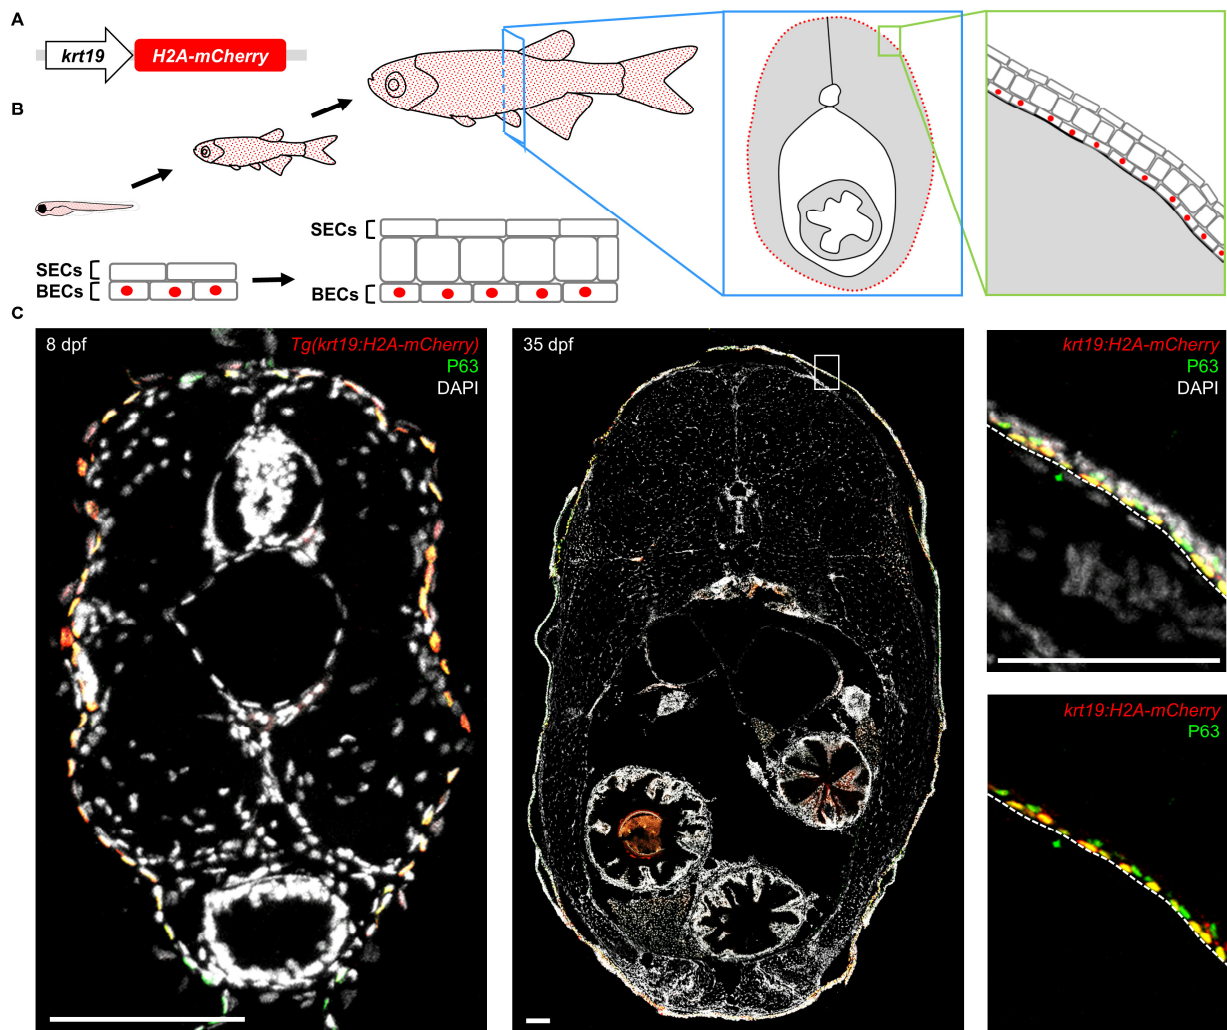

**Fig. S4. *Tg(krt19:H2A-mCherry)* line labels only the BEC stem cell population.**

- (A) The *Tg(krt19:H2A-mCherry)* transgenic construct.
- (B) Illustration depicting the development of zebrafish skin epidermis and the cell populations that are labeled in the *Tg(krt19:H2A-mCherry)<sup>as54</sup>* line. SECs, Superficial epithelial cells. BECs, Basal epithelial cells.
- (C) Cross-sections of the *Tg(krt19:H2A-mCherry)<sup>as54</sup>* line at 8 and 35 dpf. P63 Ab staining marks the BEC layer (green). DAPI stains all cells (white). 35 dpf images are stitched. White box indicates magnified area shown in the right-most images. White dashed lines mark basement membrane. dpf, days post fertilization. Scale bar, 100  $\mu$ m.

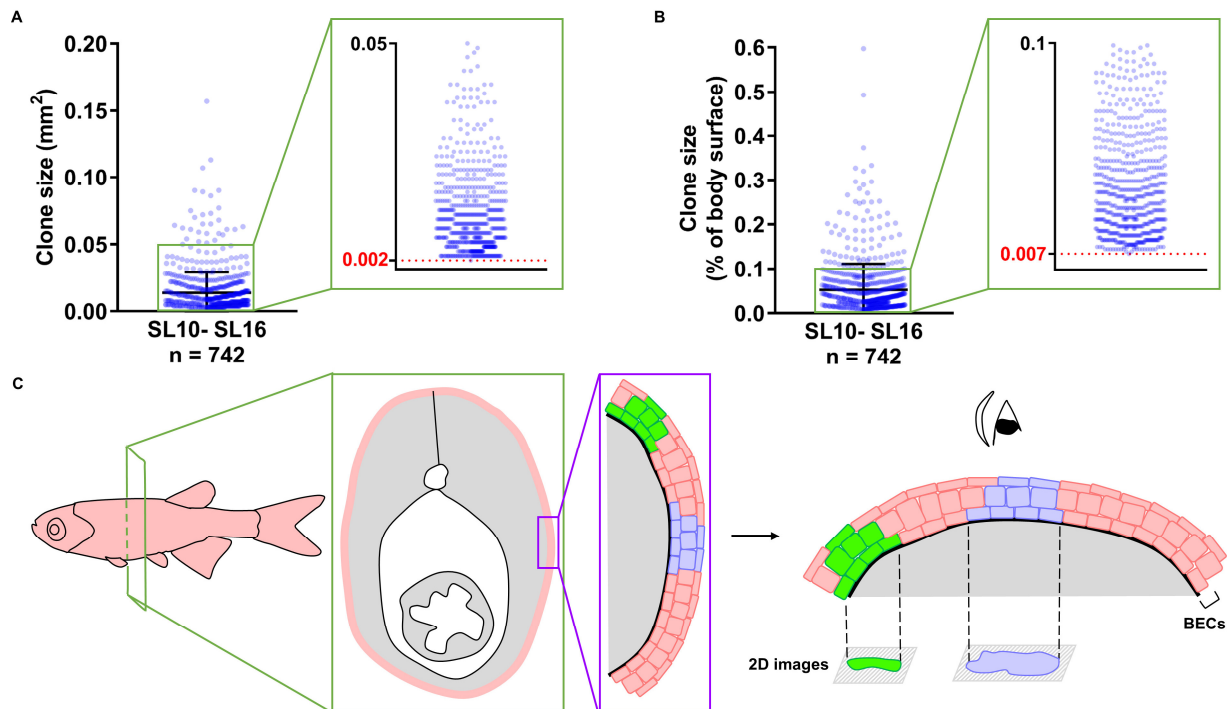

**Fig. S5. Macrophscopic imaging platform detects BEC clones larger than 0.002 mm<sup>2</sup> in size.**

- (A) Quantification of absolute clone size from all examined clones. BEC clones smaller than 0.002 mm<sup>2</sup> are below the detection limit of the imaging platform. The sizes of animals examined here ranged from SL10 to SL16 mm ( $n = 742$  clones; mean  $\pm$  SD).
- (B) Quantification of relative clone size as percentage of body surface area. BEC clones smaller than 0.007% of the body surface area are below the detection limit of the imaging platform ( $n = 742$  clones; mean  $\pm$  SD).
- (C) Illustration depicting how 2D maximum intensity projection clone images may underestimate actual clone size.

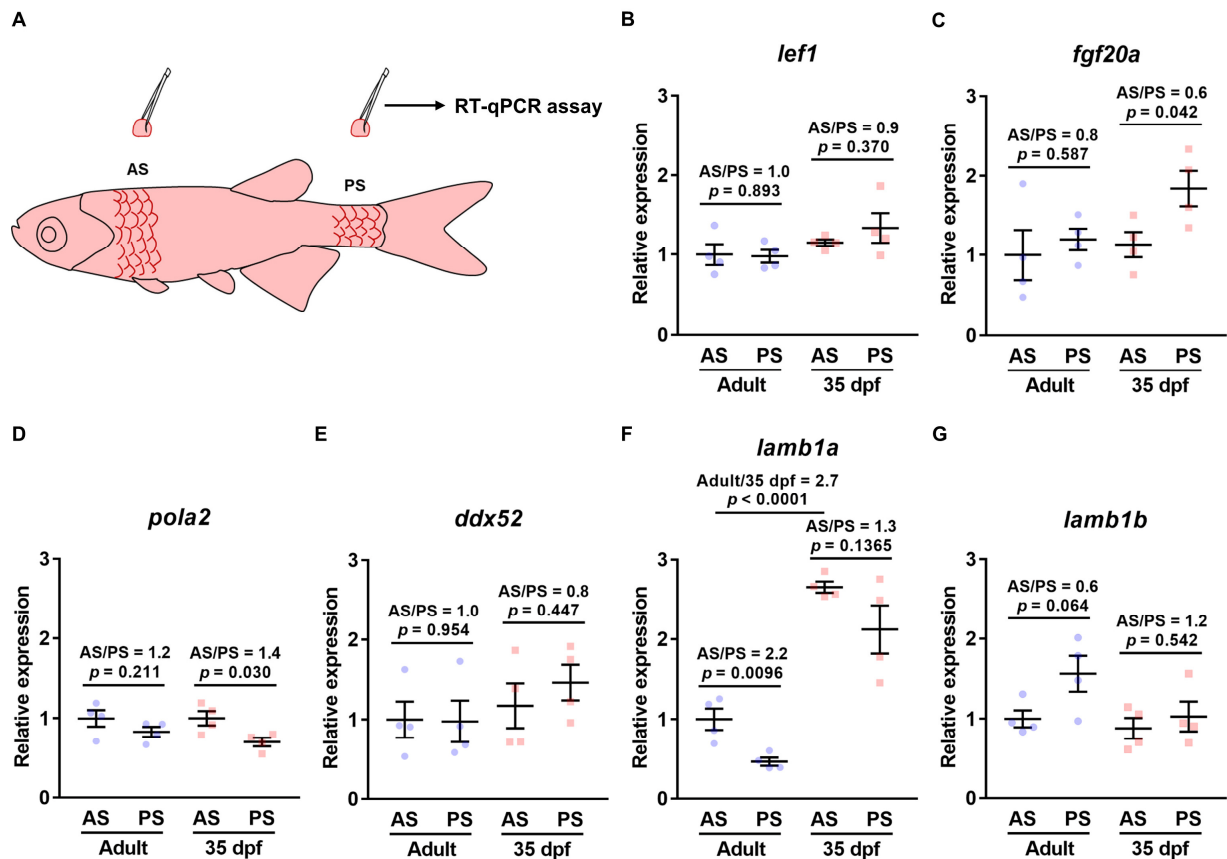

**Fig. S6. Lamb1a expression is spatially regulated in developing and homeostatic skin tissues.**

- (A) Illustration depicting scale-plucking from either AS or PS region of the animal body surface. Plucked scales containing skin BECs from distinct body regions were subjected to RT-qPCR analyses.
- (B-G) RT-qPCR analyses of *lef1*, *fgf20a*, *pola2*, *ddx52*, *lamb1a*, and *lamb1b* expression in skin tissues collected from either the AS or PS region of the animal body surface. (n = 4 biological replicates in each data point; mean  $\pm$  SEM; two-tailed Student's *t*-test).

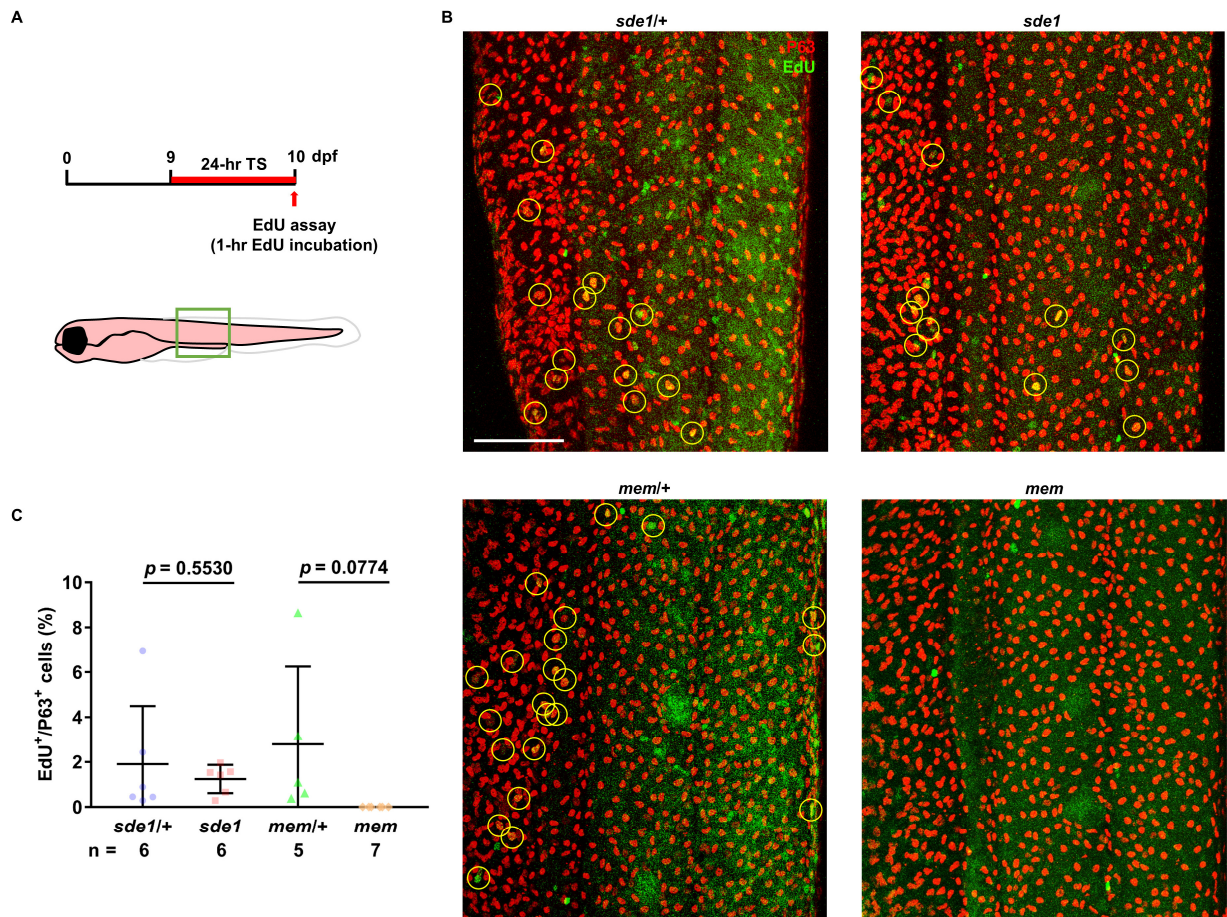

**Fig. S7. Temporal inactivation of Lamb1a activity has no significant influence on BEC proliferation in developing skin tissues.**

- (A) Illustration depicting the temperature shift (TS) and EdU incubation scheme. Green box indicates imaged body region.
- (B) Whole-mount EdU staining of *sde1* and *mem* mutant larvae. Proliferating BECs were visualized by double staining of P63 (red) and EdU (green). Yellow circles mark double-positive cells. Scale bar, 100  $\mu$ m.
- (C) Quantification of EdU<sup>+</sup> P63<sup>+</sup> double positive cells in *sde1* and *mem* mutant larvae upon heat treatment. The *mem* mutant, which carries a ts allele of the gene DNA polymerase alpha subunit 2 (*polα2*), was included as a positive control for the heat treatment (n = 6 *sde1*<sup>+/+</sup>, 6 *sde1*; 5 *mem*<sup>+/+</sup>, 7 *mem*; mean  $\pm$  SD; two-tailed Student's *t*-test).

**Table S1. List of primers used for RT-qPCR.**

| <b>RT-qPCR</b> |           |                                 |
|----------------|-----------|---------------------------------|
| Gene           | Direction | Primer sequence                 |
| <i>lef1</i>    | Forward   | CTG GTC AAC GAG ACA GAA ATC A   |
|                | Reverse   | CCT GTG CTT CTC ATG GTA AGA G   |
| <i>fgf20a</i>  | Forward   | TGG ATA GCG GAT TGT ATC TGG     |
|                | Reverse   | CAA ACT GCT CCC TGA ACA CA      |
| <i>pola2</i>   | Forward   | GTT CGG ACC TTT TGT TGA TTC A   |
|                | Reverse   | TCC ACT ATG CTG TCC ATA CAT C   |
| <i>ddx52</i>   | Forward   | GGT CTG GAG CAA AGT TTG ATT T   |
|                | Reverse   | ATC ACT TGC TTC TCC TTC TTC A   |
| <i>lamb1a</i>  | Forward   | CCC CTG TCG ATG GAA CTG         |
|                | Reverse   | TAC ACA TAC AAT GAC CAT GAA CCA |
| <i>lamb1b</i>  | Forward   | CTC CCA ACC GCC TTA AAA C       |
|                | Reverse   | AAT CCA GCT GAA TGG TCA CA      |
| <i>actb</i>    | Forward   | TAC ACA GCC ATG GAT GAG GAA AT  |
|                | Reverse   | TCC CTG ATG TCT GGG TCG TC      |
